# Supplementary material for: Population structure of KPC carbapenemase-producing Klebsiella pneumoniae in a long-term acute-care rehabilitation facility: identification of a new lineage of clonal group 101, associated with local hyperendemicity
Source: PubMed Central journal article supplement — Microb Genom. 2020 Jan 2;6(1):e000308. doi: 10.1099/mgen.0.000308 (PMC7067035; doi:10.1099/mgen.0.000308), 2020-01-02

**Figure S1.** A SNP-derived maximum likelihood phylogenetic tree (midpoint rooted) of *K.pneumoniae* isolates belonging to clonal group (CG) 101, including ST101 and ST2502, constructed using Snippy and IQ-tree (see the Methods section) and using *K. pneumoniae* DG5544 as reference genome. Bootstrap-based branch support values, obtained from 100 replicate trees, are indicated as branch labels. Branches showing bootstrap values lesser than 50 were collapsed. The scale bar shows substitutions per nucleotide position. Colored squares give provide details about the origin of analyzed strains (AOUC, Florence Careggi University Hospital; LTACRF, long-term acute-care rehabilitation facility), the isolation month referring to study period (2016) and about the patients' room numbers. Sublineages (SL) A and B of ST101 isolates are also indicated by red boxes.

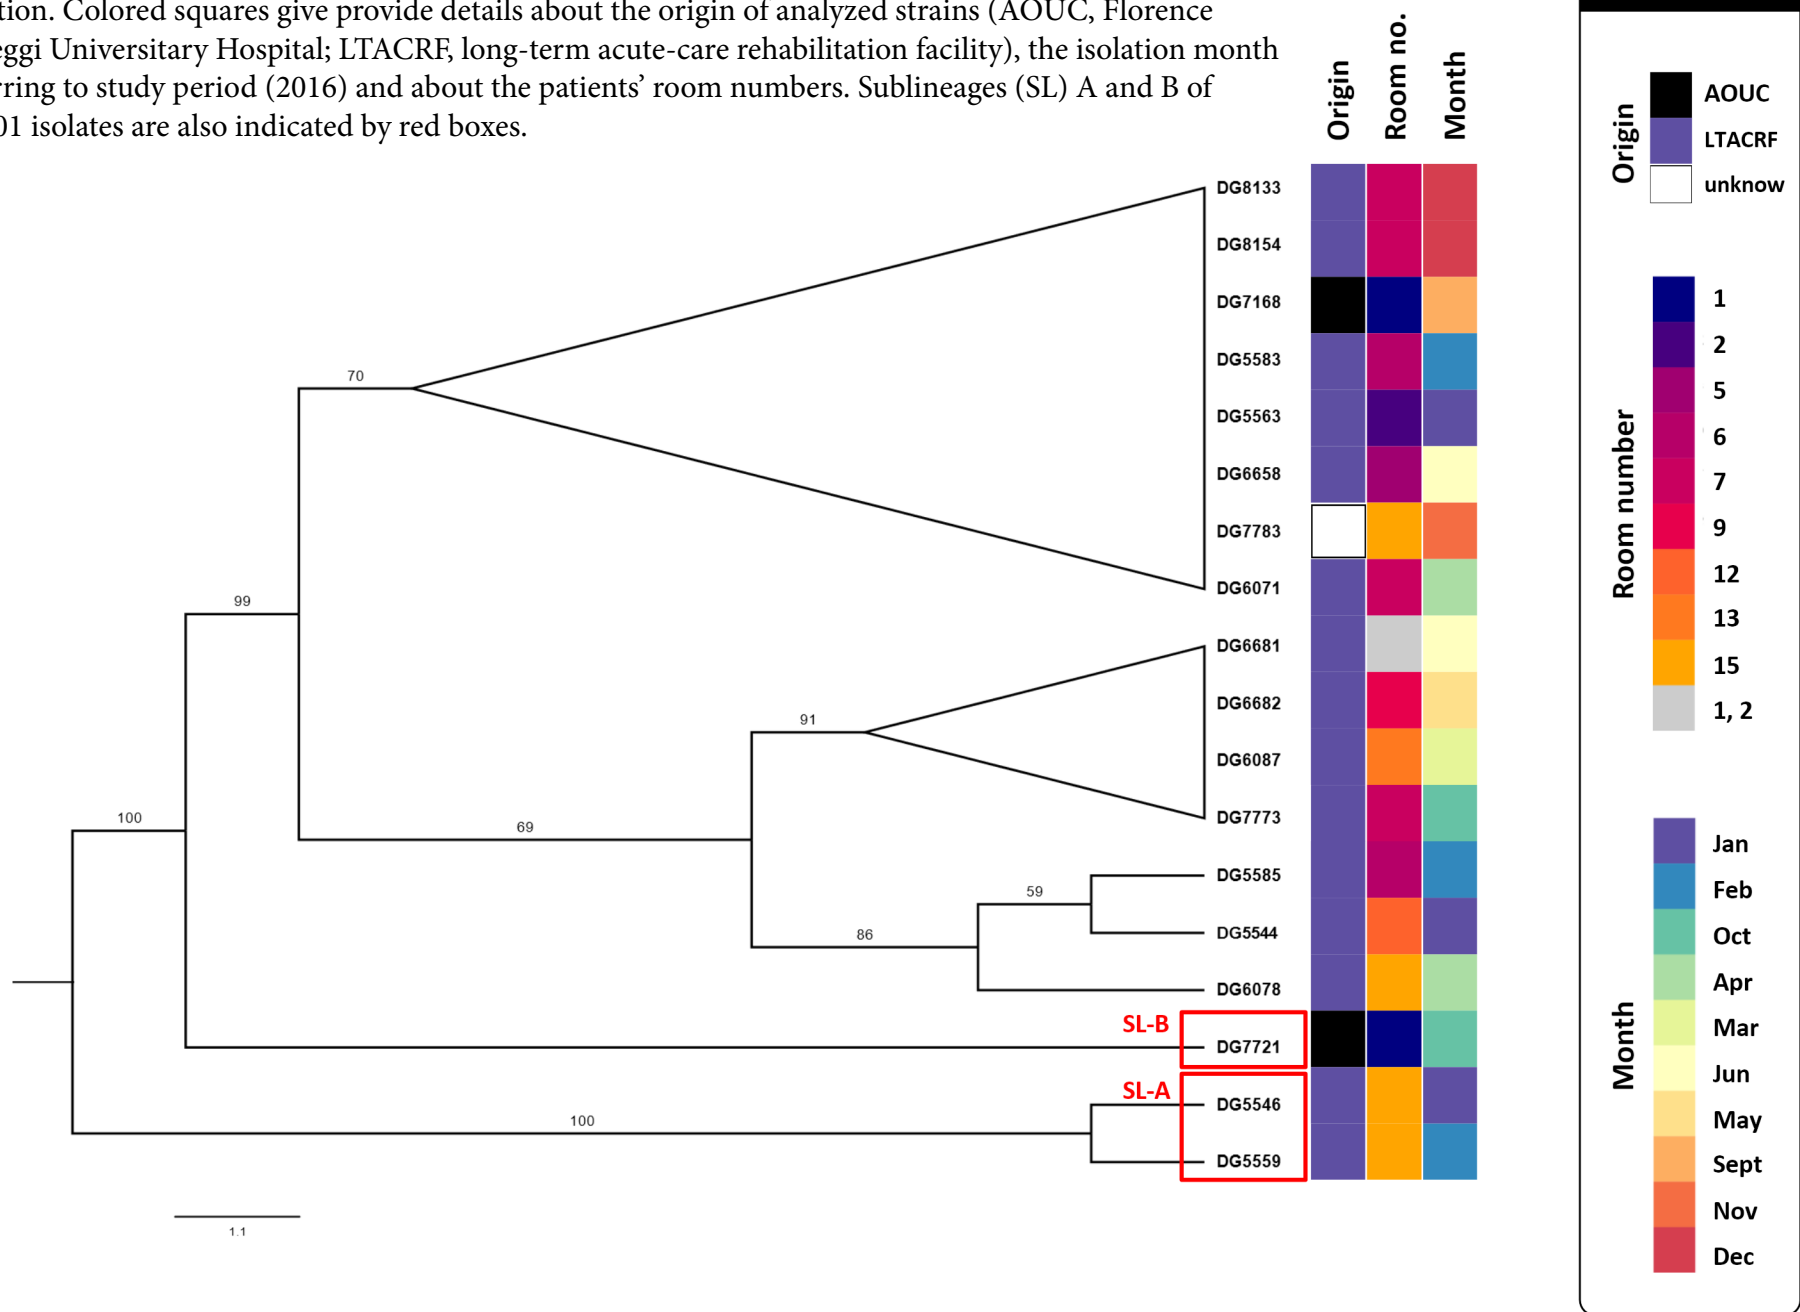

Supplement: mgen-6-308-s002.pdf [file mgen-6-308-s002.pdf]
